# Supplementary material for: Synthesis of antibacterial and magnetic nanocomposites by decorating graphene oxide surface with metal nanoparticles
Source: Royal Society of Chemistry journal article supplement (doi:10.1039/c5ra15578a), 2015-01-01
Supplement: c5ra15578a1.pdf [file c5ra15578a1.pdf]

### Supporting Information

|                                | Size (d.nm):         | % Intensity |
|--------------------------------|----------------------|-------------|
| <b>Z-Average (d.nm):</b> 144.2 | <b>Peak 1:</b> 279.7 | 96.5        |
| <b>Pdl:</b> 0.565              | <b>Peak 2:</b> 4469  | 3.5         |

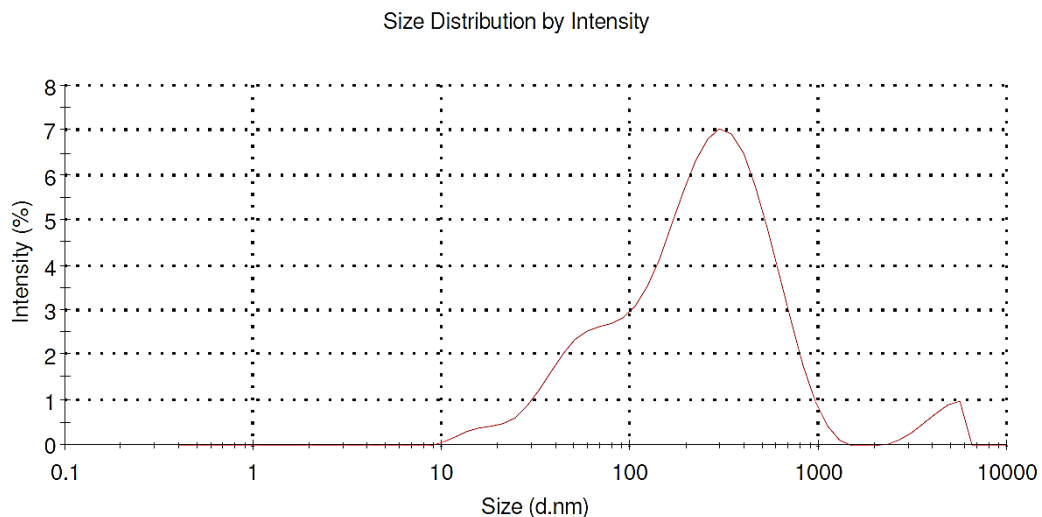

**Figure S1.** The particle size and polydispersity index (Pdl) of the cinnamon coated Ag NPs, measured by the dynamic light scattering (DLS).

The hydrodynamic diameter of cinnamon coated Ag NPs is estimated to be 280 nm. In general, the particle size measured by DLS is bigger than the size observed under the transmission electron microscopy (TEM).
